# Supplementary material
Source: MDPI journal article supplement (https://www.mdpi.com/2673-9879/3/2/31)
Supplement: s1 [file s1]

Archive with 1 entries (1 files):
- futurepharmacol-2356963-supplementary.pdf
